# Supplementary material for: Bioactive Pregnane Steroids from a South China Sea Gorgonian Carijoa sp
Source: PubMed Central journal article supplement (PMC6270022; doi:10.3390/molecules18033458), 2013-03-15

## Supplementary Materials

- Figure S1.**  $^1\text{H}$ -NMR spectrum (400 MHz, DMSO) of compound **1**.
- Figure S2.** Partial  $^1\text{H}$ -NMR spectrum (400 MHz, DMSO) of compound **1**.
- Figure S3.**  $^{13}\text{C}$ -NMR spectrum (100 MHz, DMSO) of compound **1**.
- Figure S4.** Partial  $^{13}\text{C}$ -NMR spectrum (100 MHz, DMSO) of compound **1**.
- Figure S5.** HMQC spectrum of compound **1** in DMSO.
- Figure S6.** HMBC spectrum of compound **1** in DMSO.
- Figure S7.**  $^1\text{H}$ - $^1\text{H}$  COSY spectrum of compound **1** in DMSO.
- Figure S8.** NOESY spectrum of compound **1** in DMSO.
- Figure S9.** HRESI spectrum of compound **1**.
- Figure S10.**  $^1\text{H}$ -NMR spectrum (400 MHz,  $\text{CDCl}_3$ ) of compound **2**.
- Figure S11.**  $^{13}\text{C}$ -NMR spectrum (400 MHz,  $\text{CDCl}_3$ ) of compound **2**.
- Figure S12.**  $^1\text{H}$ -NMR spectrum (400 MHz, DMSO) of compound **3**.
- Figure S13.** HRESI spectrum of compound **3**.
- Figure S14.**  $^1\text{H}$ -NMR spectrum (400 MHz, DMSO) of compound **4**.
- Figure S15.**  $^1\text{H}$ -NMR spectrum (600 MHz,  $\text{CDCl}_3$ ) of compound **1**.
- Figure S16.**  $^1\text{H}$ -NMR spectrum (600 MHz,  $\text{CDCl}_3$ ) of compound **1s**.
- Figure S17.**  $^1\text{H}$ - $^1\text{H}$  COSY spectrum of compound **1s** in  $\text{CDCl}_3$ .
- Figure S18.** ESI-MS of compound **1s**.
- Figure S19.**  $^1\text{H}$ -NMR spectrum (600 MHz,  $\text{CDCl}_3$ ) of compound **1r**.
- Figure S20.**  $^1\text{H}$ - $^1\text{H}$  COSY spectrum of compound **1r** in  $\text{CDCl}_3$ .
- Figure S21.** ESI-MS of compound **1r**.

**Figure S1.**  $^1\text{H}$ -NMR spectrum (400 MHz, DMSO) of compound **1**.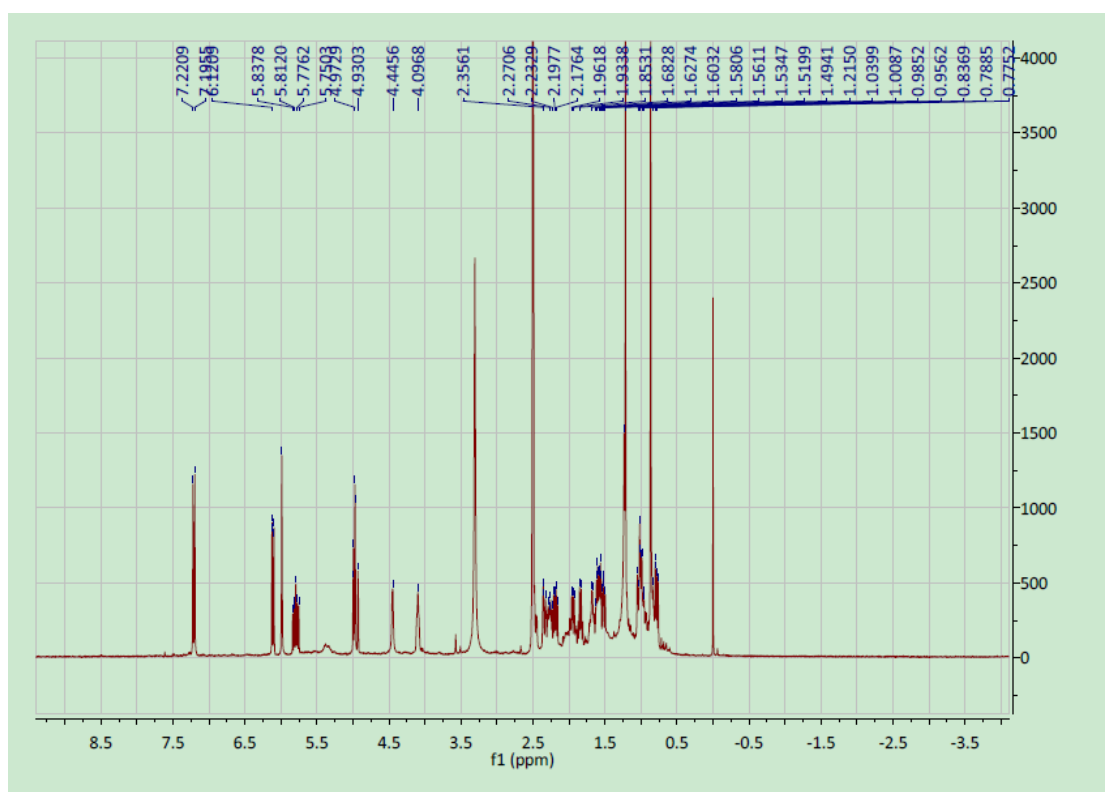**Figure S2.** Partial  $^1\text{H}$ -NMR spectrum (400 MHz, DMSO) of compound **1**.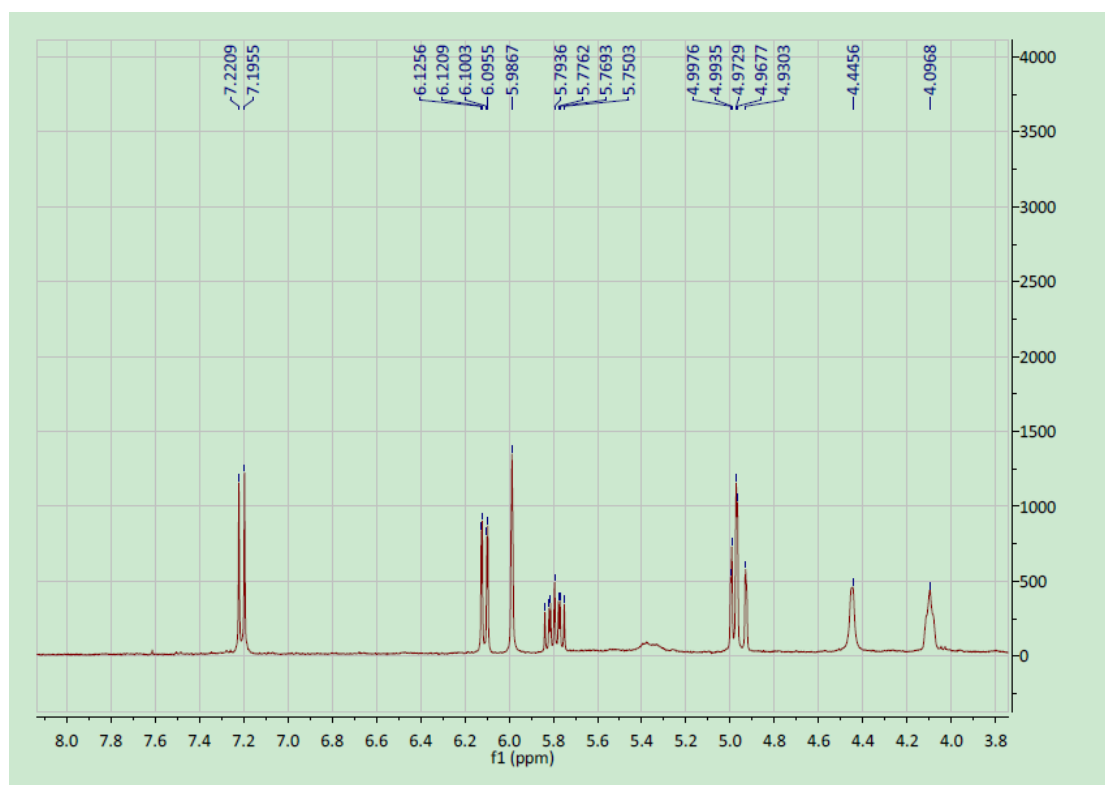

**Figure S3.**  $^{13}\text{C}$ -NMR spectrum (100 MHz, DMSO) of compound **1**.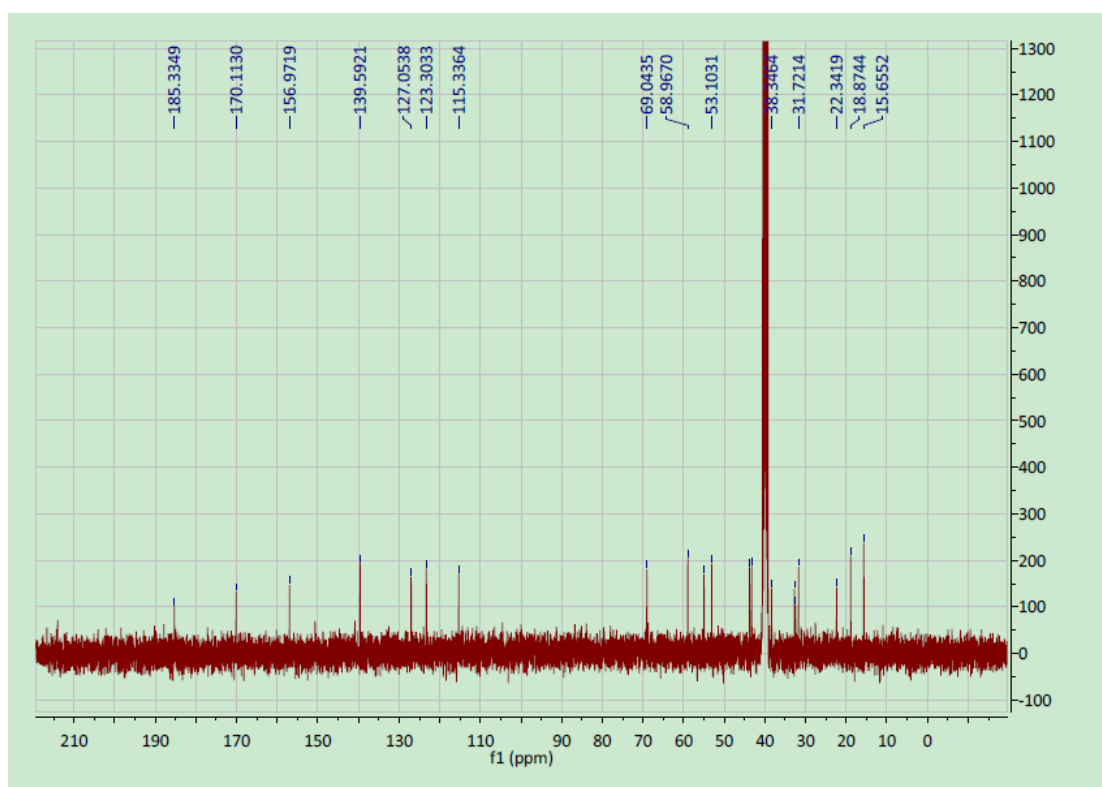**Figure S4.** Partial  $^{13}\text{C}$ -NMR spectrum (100 MHz, DMSO) of compound **1**.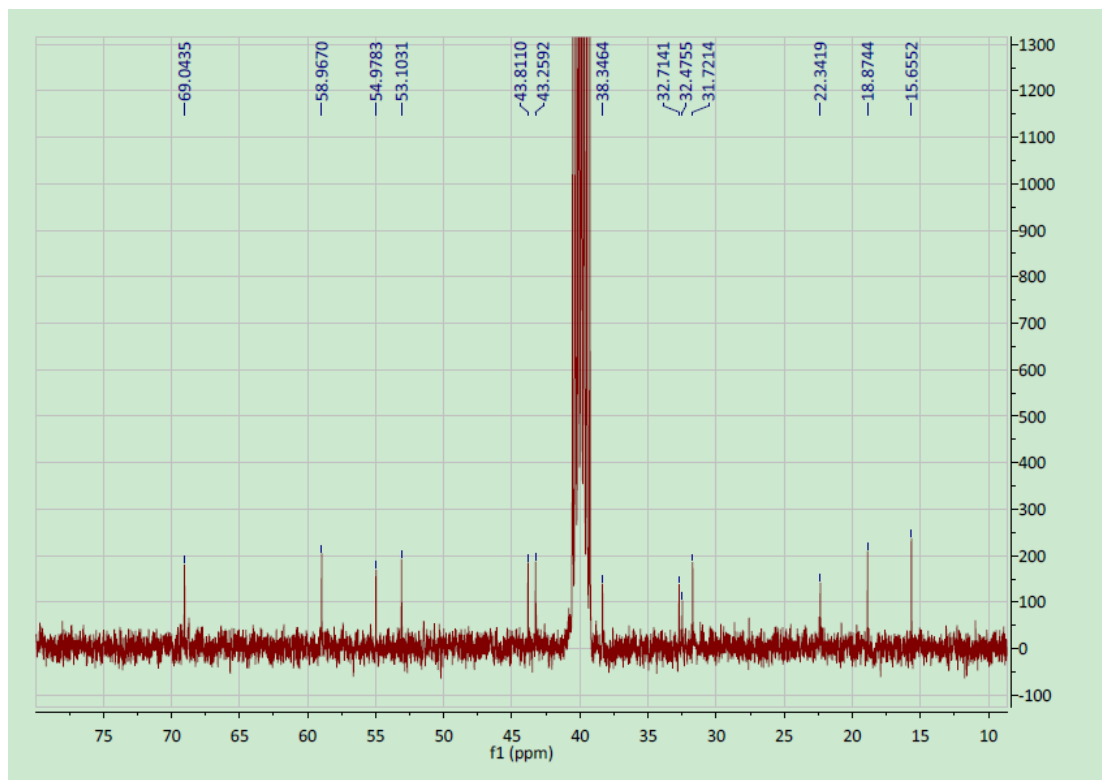

**Figure S5.** HMQC spectrum of compound **1** in DMSO.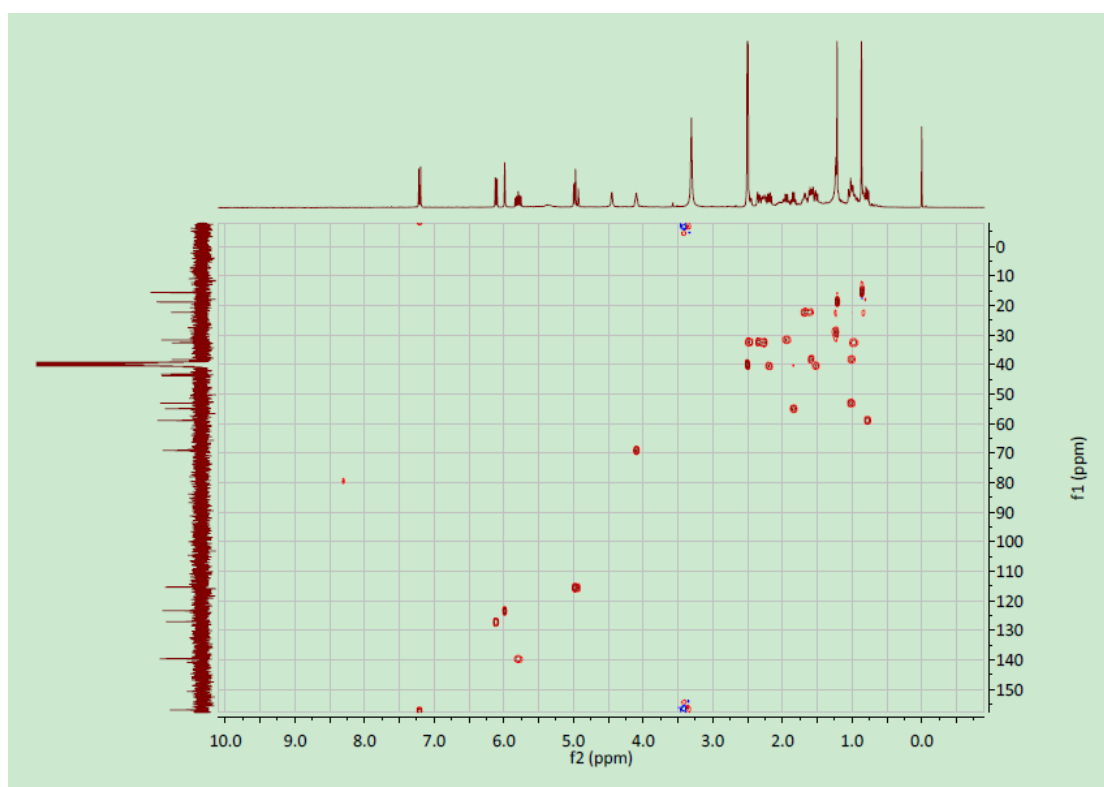**Figure S6.** HMBC spectrum of compound **1** in DMSO.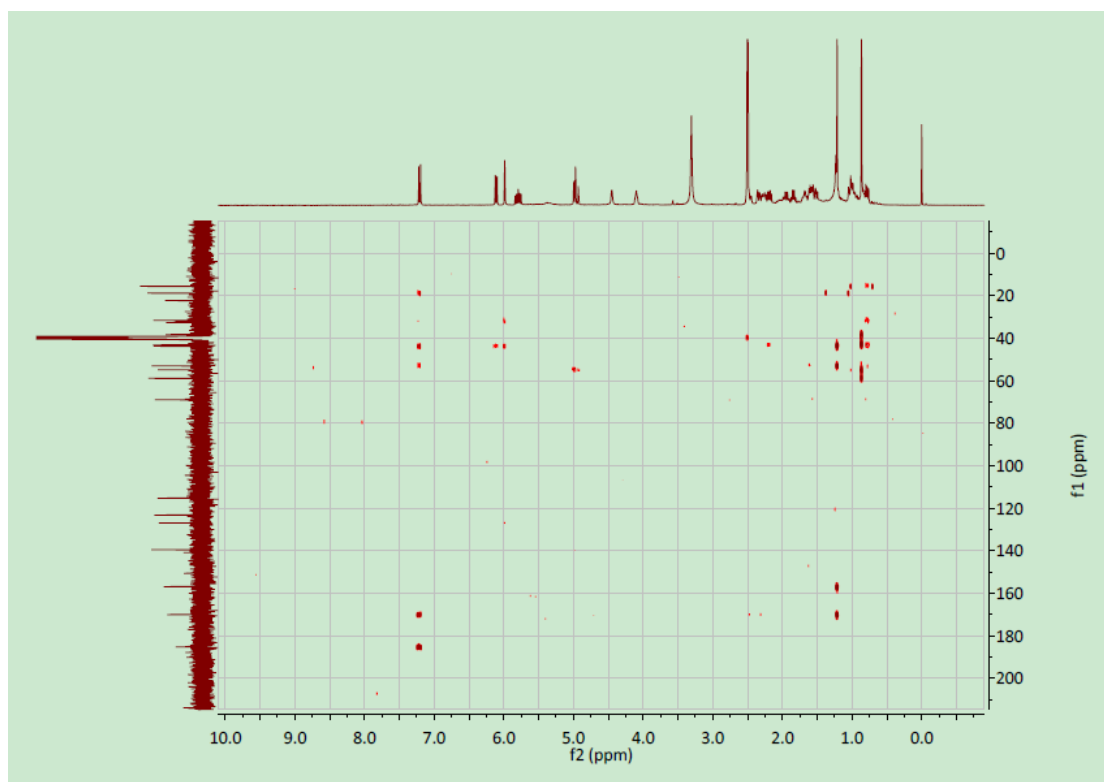

**Figure S7.**  $^1\text{H}$ - $^1\text{H}$  COSY spectrum of compound **1** in DMSO.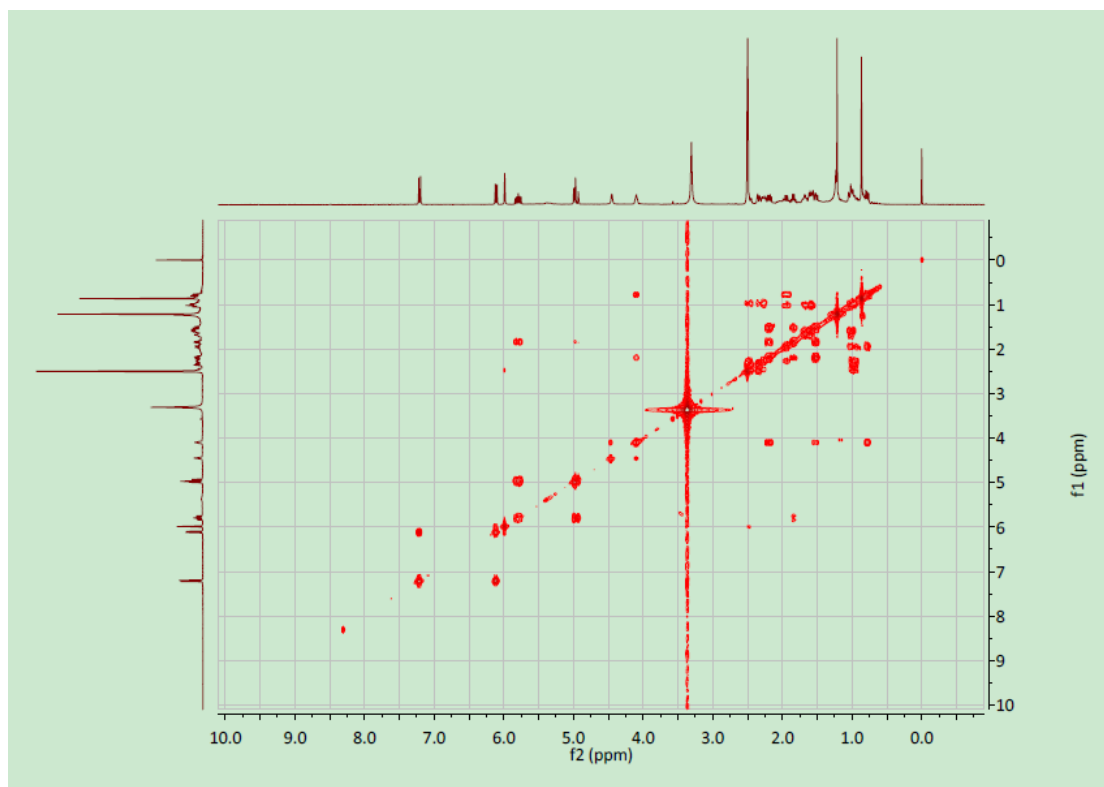**Figure S8.** NOESY spectrum of compound **1** in DMSO.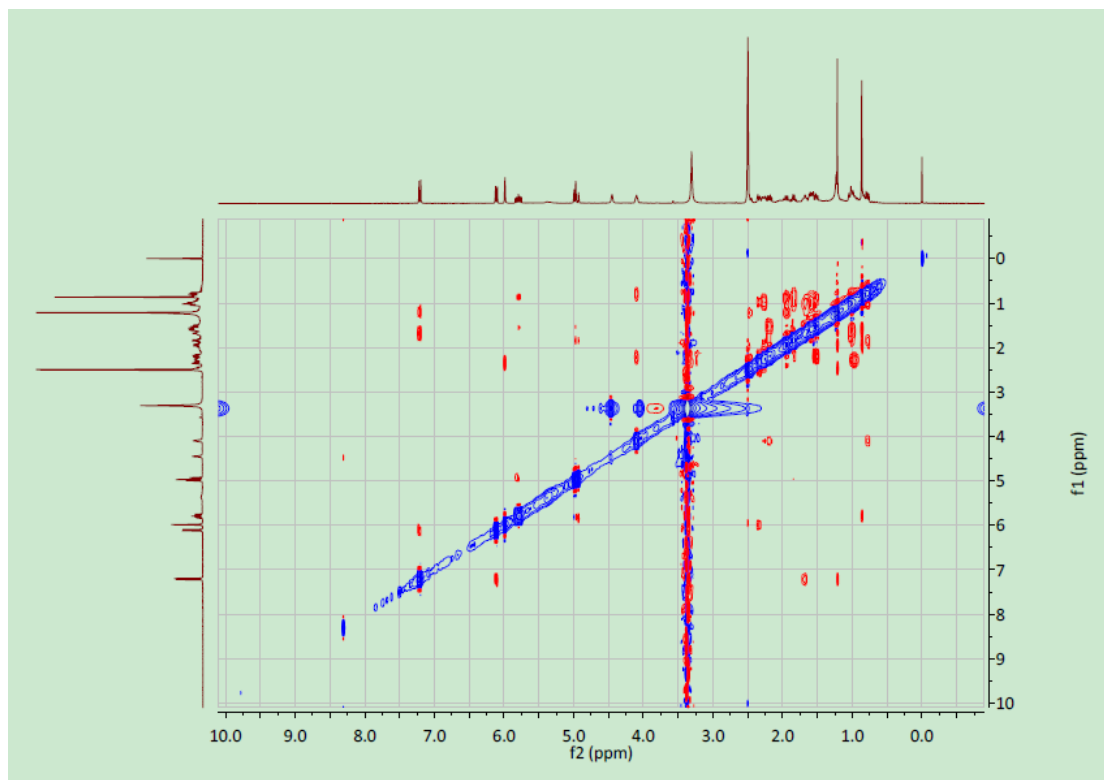

Figure S9. HRESI spectrum of compound 1.

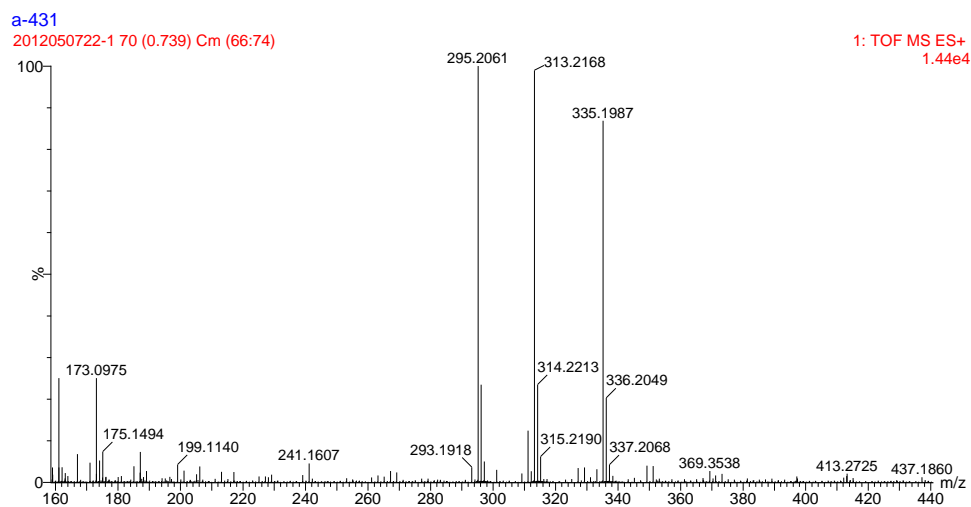Figure S10.  $^1\text{H-NMR}$  spectrum (400 MHz,  $\text{CDCl}_3$ ) of compound 2.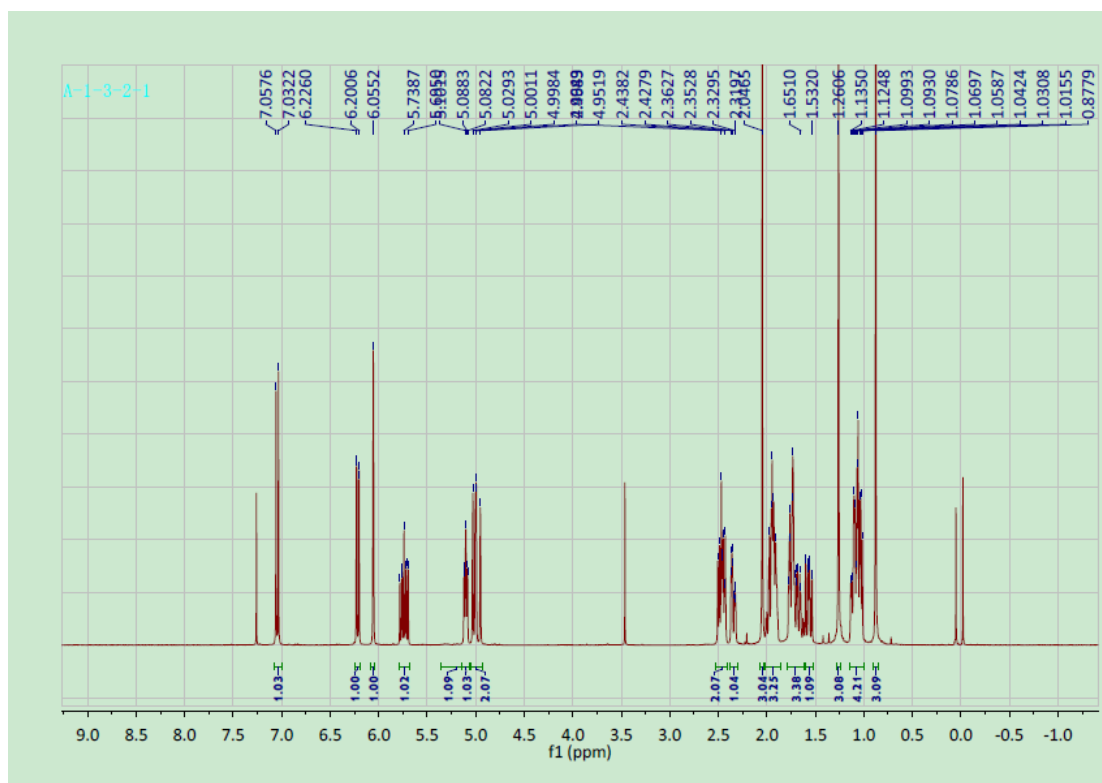

**Figure S11.**  $^{13}\text{C}$ -NMR spectrum (400 MHz,  $\text{CDCl}_3$ ) of compound 2.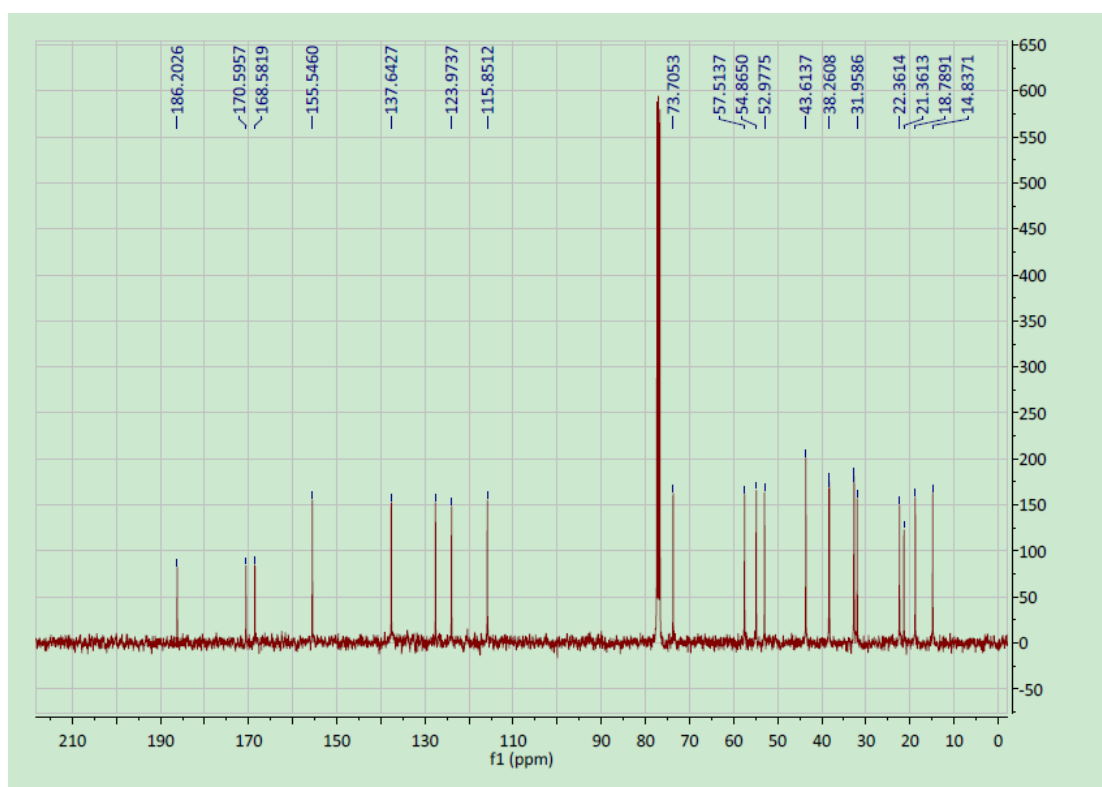**Figure S12.**  $^1\text{H}$ -NMR spectrum (400 MHz, DMSO) of compound 3.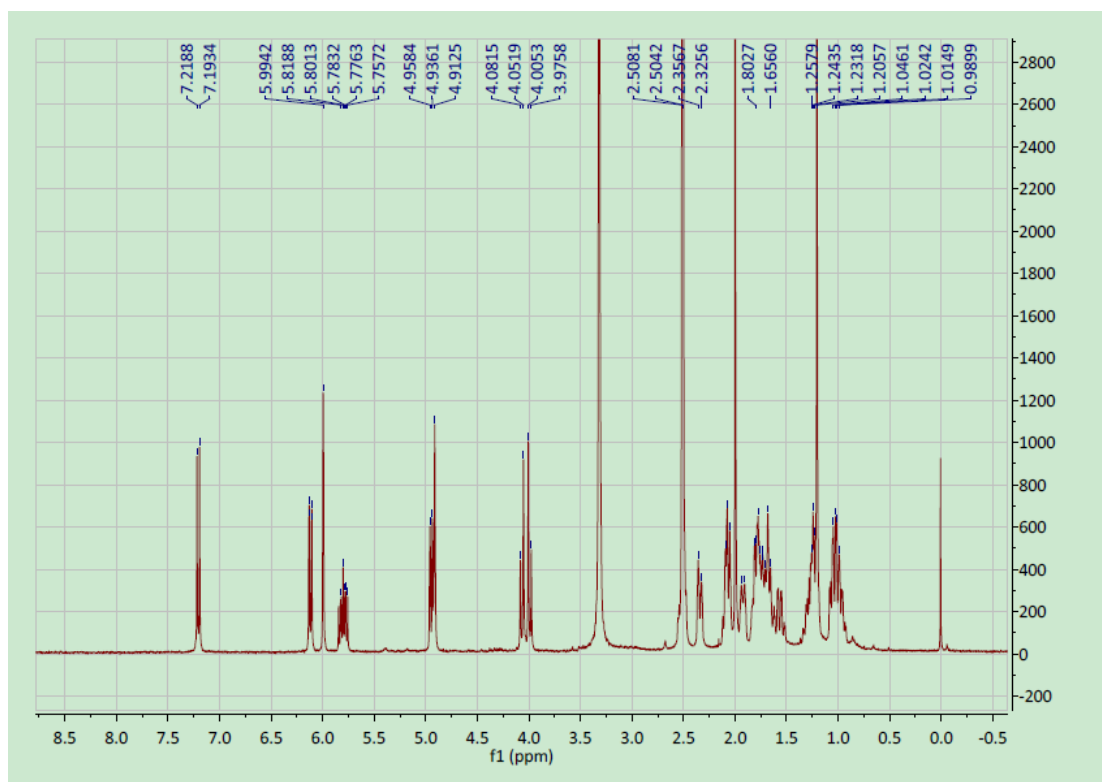

Figure S13. HRESI spectrum of compound 3.

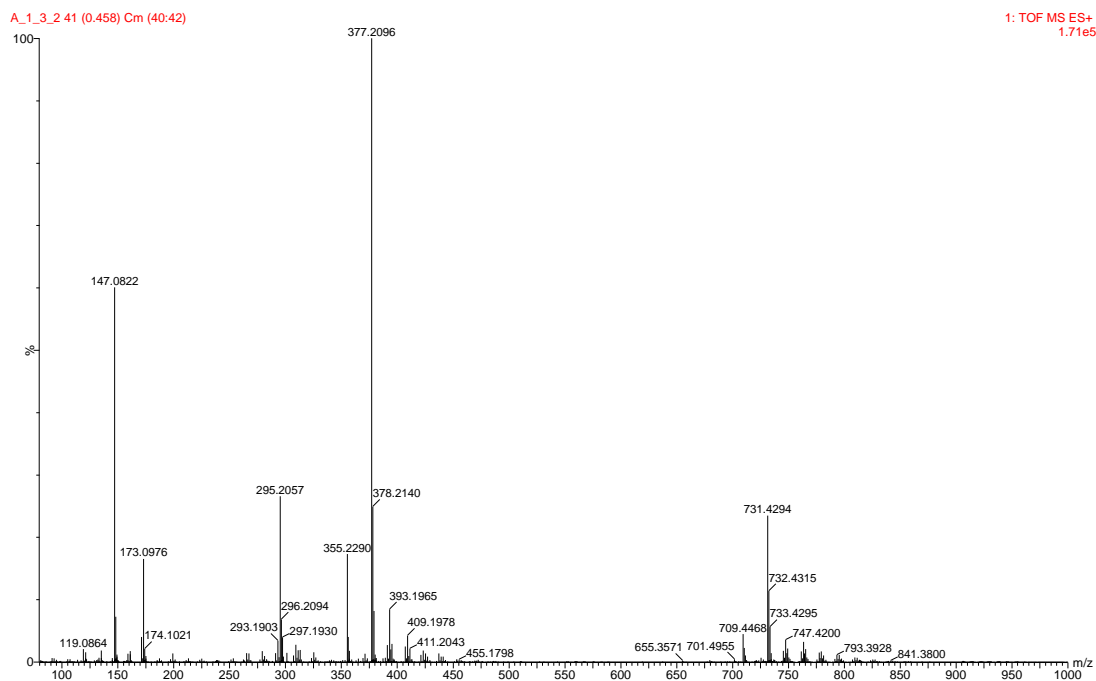Figure S14.  $^1\text{H-NMR}$  spectrum (400 MHz, DMSO) of compound 4.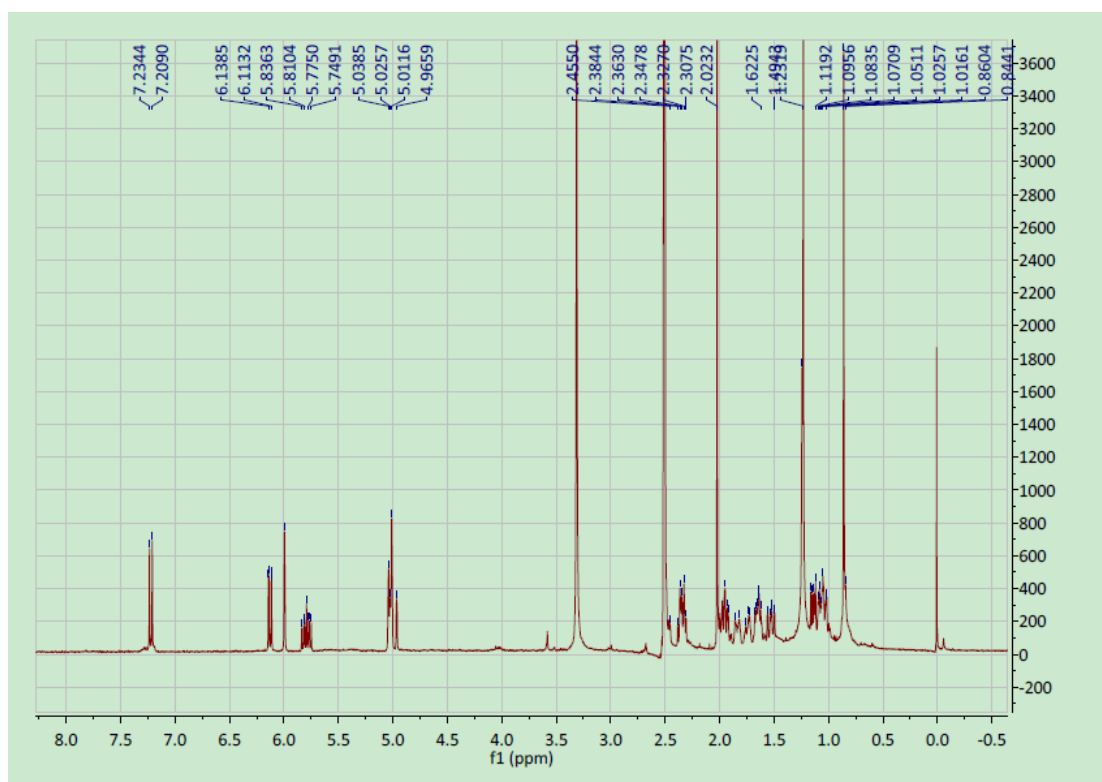



**Figure S15.**  $^1\text{H-NMR}$  spectrum (600 MHz,  $\text{CDCl}_3$ ) of compound **1**.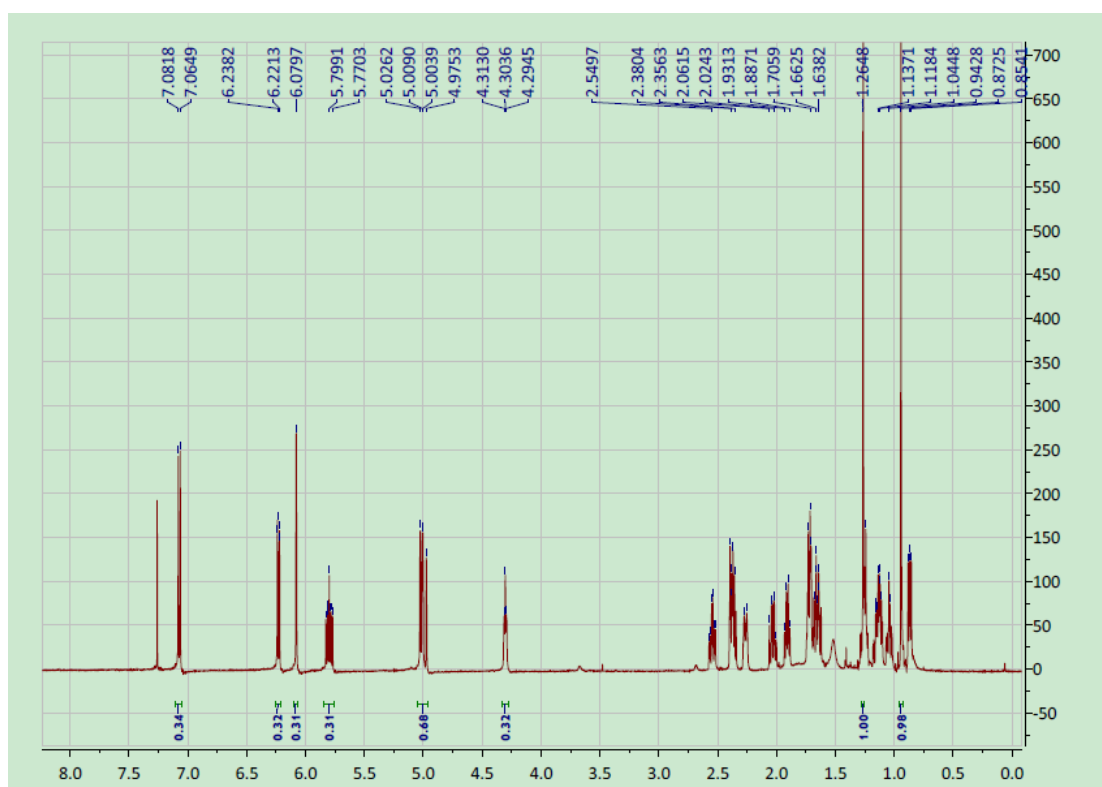**Figure S16.**  $^1\text{H-NMR}$  spectrum (600 MHz,  $\text{CDCl}_3$ ) of compound **1s**.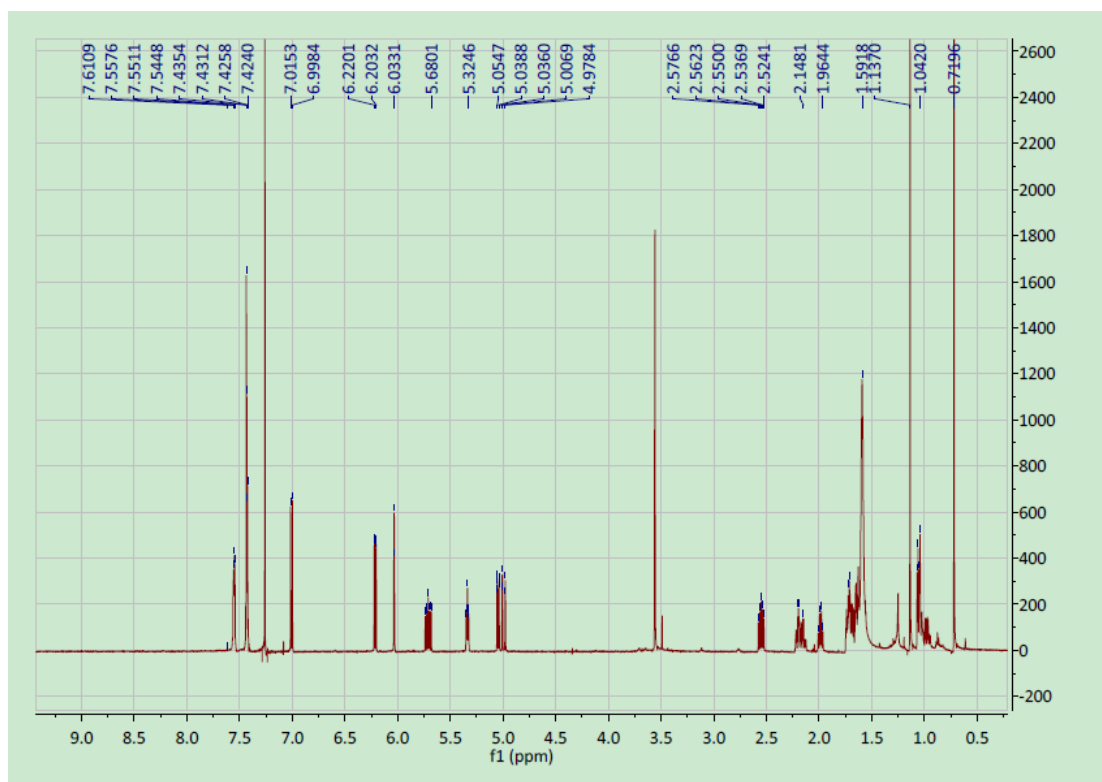

Figure S17.  $^1\text{H}$ - $^1\text{H}$  COSY spectrum of compound **1s** in  $\text{CDCl}_3$ .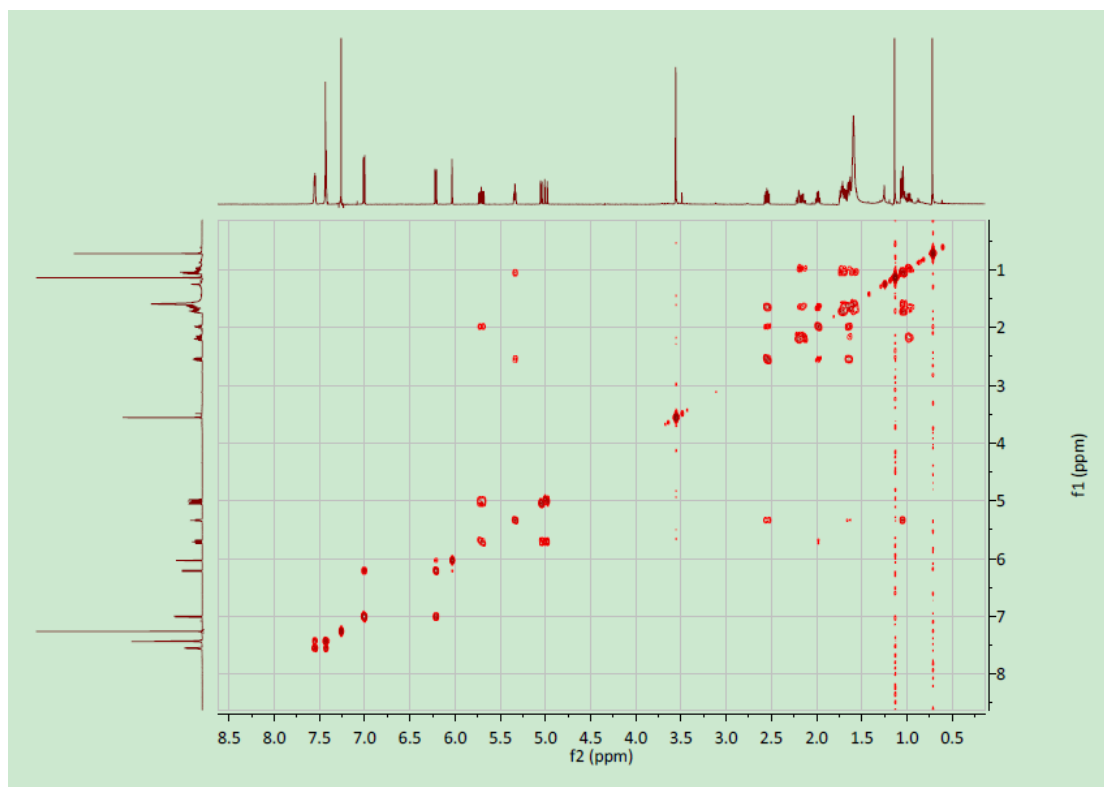Figure S18. ESI-MS of compound **1s**.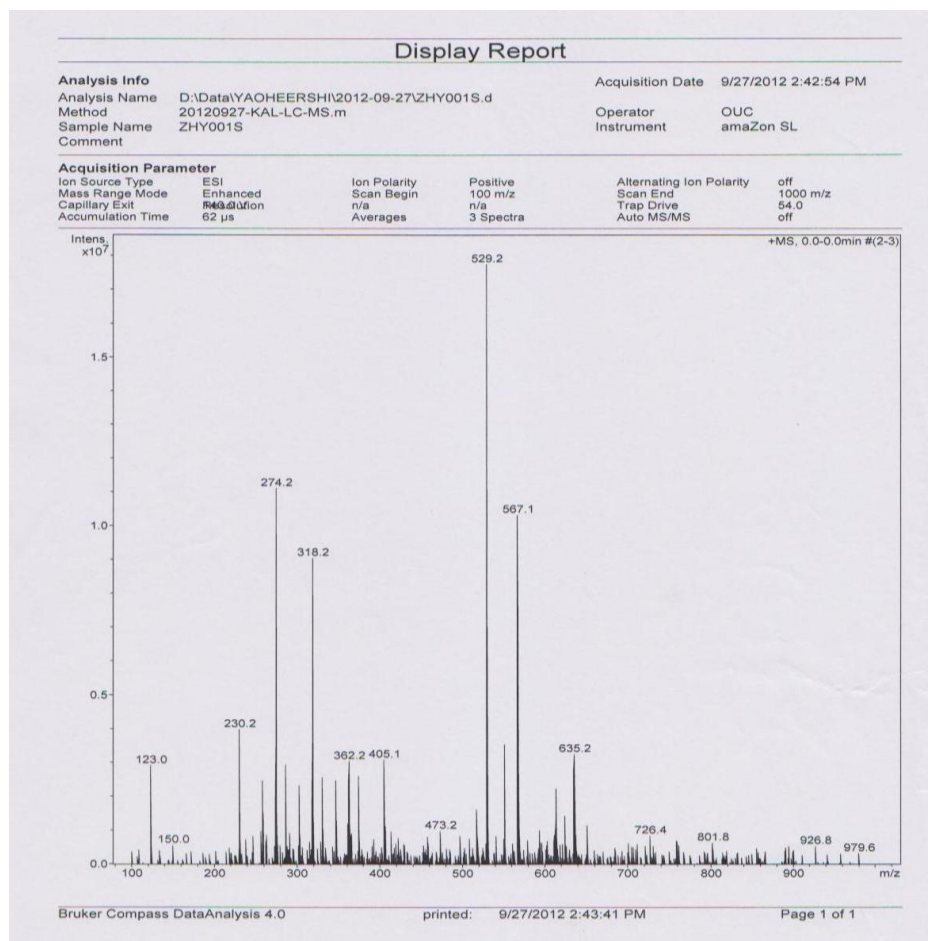

**Figure S19.**  $^1\text{H}$ -NMR spectrum (600 MHz,  $\text{CDCl}_3$ ) of compound **1r**.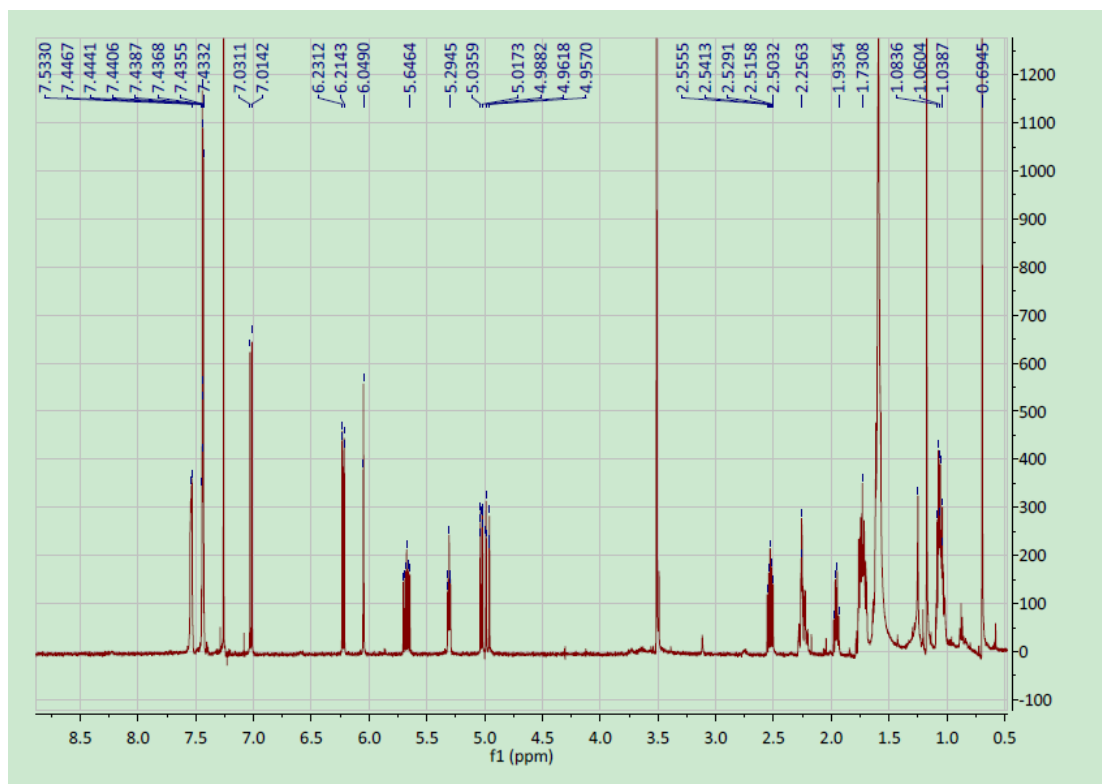**Figure S20.**  $^1\text{H}$ - $^1\text{H}$  COSY spectrum of compound **1r** in  $\text{CDCl}_3$ .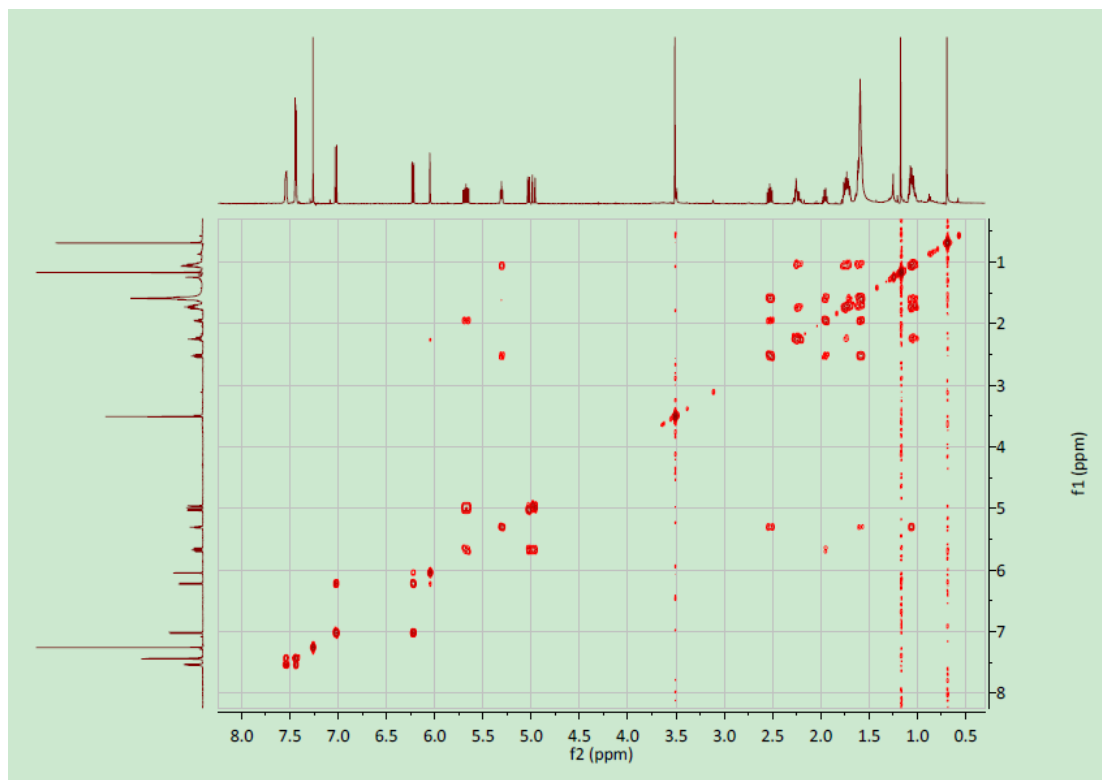

Figure S21. ESI-MS of compound 1r.

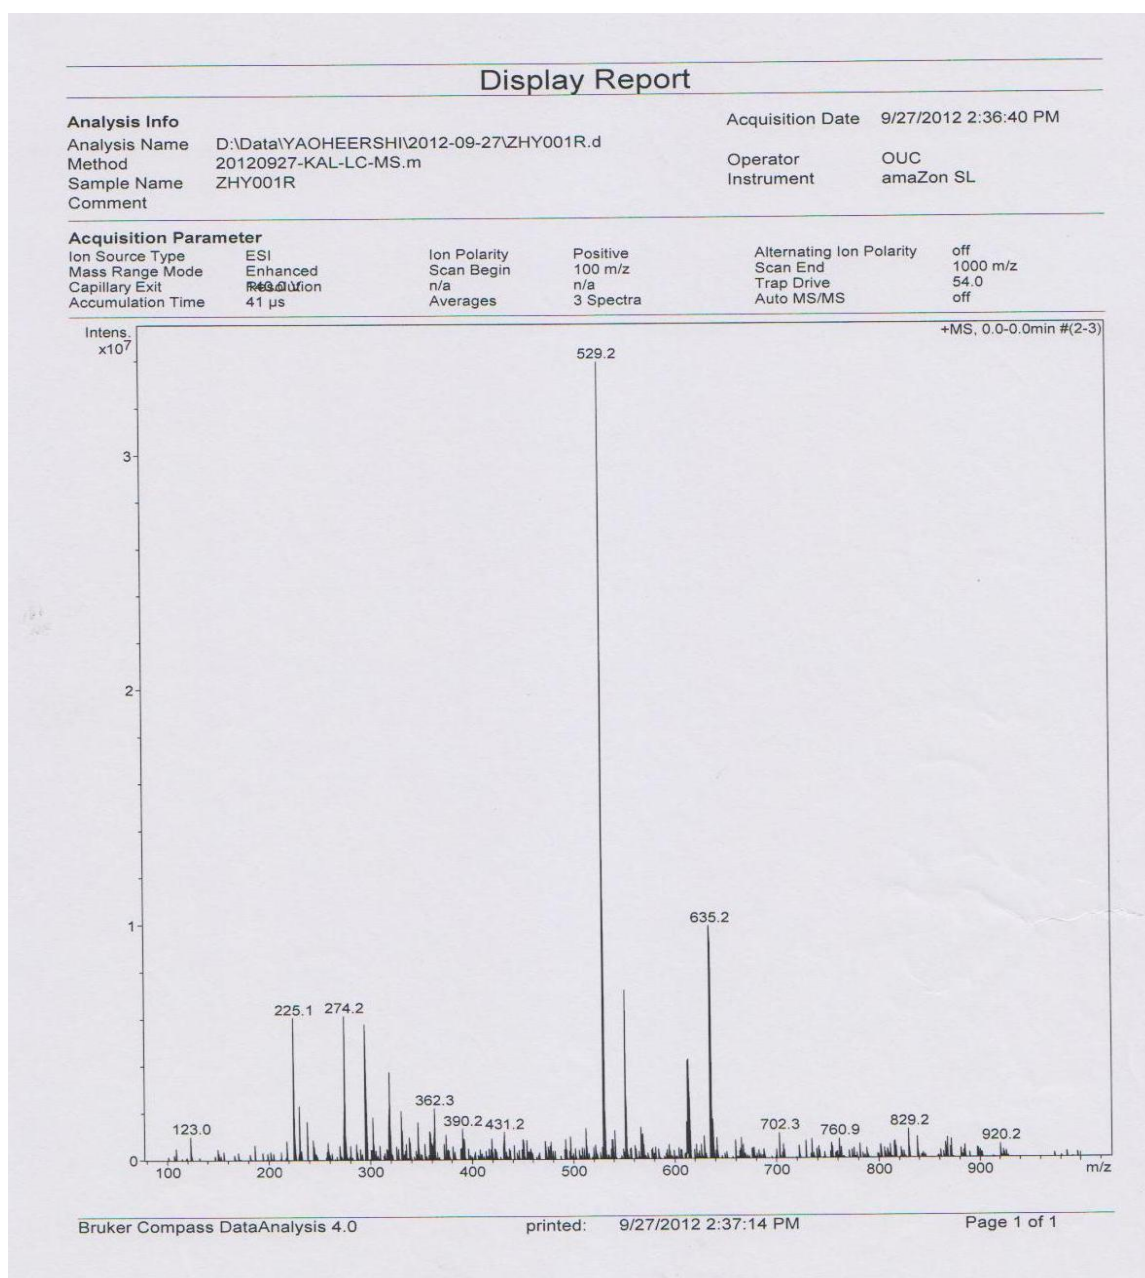

Supplement: molecules-18-03458-s001.pdf [file molecules-18-03458-s001.pdf]
